# Supplementary material for: Antarctic Ice Sheet grounding line discharge from 1996–2024
Source: Copernicus journal article supplement (doi:10.5194/essd-17-3259-2025), 2025-07-07
Supplement: Supplementary file 1 [file essd-17-3259-2025-supplement.zip]

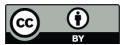

## *Supplement of*

# **Antarctic Ice Sheet grounding line discharge from 1996–2024**

**Benjamin J. Davison et al.**

*Correspondence to:* Benjamin J. Davison ([b.j.davison@sheffield.ac.uk](mailto:b.j.davison@sheffield.ac.uk))

- [essd-17-3259-2025-supplement-title-page.pdf](#)
- [Table S1.xlsx](#)
- [summary\\_figs](#)
  - [0001\\_Antarctica.png](#)
  - [0002\\_West\\_Antarctica\\_Rignot.png](#)
  - [0003\\_East\\_Antarctica\\_Rignot.png](#)
  - [0004\\_Peninsula\\_Rignot.png](#)
  - [0005\\_West\\_Antarctica\\_Zwally.png](#)
  - [0006\\_East\\_Antarctica\\_Zwally.png](#)
  - [0007\\_Peninsula\\_Zwally.png](#)
  - [0008\\_A-Ap.png](#)
  - [0009\\_Ap-B.png](#)
  - [0010\\_B-C.png](#)
  - [0011\\_C-Cp.png](#)
  - [0012\\_Cp-D.png](#)
  - [0013\\_D-Dp.png](#)
  - [0014\\_Dp-E.png](#)
  - [0015\\_E-Ep.png](#)
  - [0016\\_Ep-F.png](#)
  - [0017\\_F-G.png](#)
  - [0018\\_G-H.png](#)
  - [0019\\_H-Hp.png](#)
  - [0020\\_Hp-I.png](#)
  - [0021\\_I-Ipp.png](#)
  - [0022\\_Ipp-J.png](#)

- 0023\_J-Jpp.png
- 0024\_Jpp-K.png
- 0025\_K-A.png
- 0026\_Abbot.png
- 0027\_Academy.png
- 0028\_Adelie Coast.png
- 0029\_Airy Rotz Seller.png
- 0030\_Alison.png
- 0031\_American HighLand.png
- 0032\_Amundsen.png
- 0033\_Atka.png
- 0034\_Aviator.png
- 0035\_Bach.png
- 0036\_Bailey.png
- 0037\_Baudouin.png
- 0038\_Beardmore.png
- 0039\_Bindschadler.png
- 0040\_Borchgrevink.png
- 0041\_Bowman Strom Live Axel-Heigerg.png
- 0042\_Brahms.png
- 0043\_Brunt Stancomb.png
- 0044\_Budd Coast.png
- 0045\_Butler-Swinburne.png
- 0046\_Byrd.png
- 0047\_Campbell-Tinker.png
- 0048\_Cape Jeremy.png
- 0049\_Carlson.png
- 0050\_Clarie Coast.png
- 0051\_Coats Coast.png
- 0052\_Conger Glenzer.png
- 0053\_Cook.png
- 0054\_Cooke.png
- 0055\_Cosgrove.png
- 0056\_Crane.png
- 0057\_D Orville Coast.png
- 0058\_David.png
- 0059\_Denman Scott.png
- 0060\_Dibble.png
- 0061\_Dry Valleys.png
- 0062\_Drygalski.png
- 0063\_Drygalskis Headland.png
- 0064\_Eastern Graham Land.png

- 0065\_Echelmeyer.png
- 0066\_Edward VIII.png
- 0067\_Ekstrom.png
- 0068\_Enderby Land.png
- 0069\_Enderby Land2.png
- 0070\_Evans.png
- 0071\_Evans Headland.png
- 0072\_Ferrigno.png
- 0073\_Fisher.png
- 0074\_Flask.png
- 0075\_Fleming.png
- 0076\_Foundation.png
- 0077\_Fox.png
- 0078\_Frost.png
- 0079\_Frostman-Lord-Shuman-Anandakri.png
- 0080\_George VI.png
- 0081\_Getz.png
- 0082\_Hamilton.png
- 0083\_Harriott.png
- 0084\_Harriott Headland.png
- 0085\_Haynes.png
- 0086\_Hektoria Green Evans.png
- 0087\_Hektoria Headland.png
- 0088\_Hercules.png
- 0089\_Holmes.png
- 0090\_Hull.png
- 0091\_Icebreaker-Fitzgerald.png
- 0092\_Ingrid Christensen Coast.png
- 0093\_Institute.png
- 0094\_Jackson-Perkins.png
- 0095\_Jason Peninsula.png
- 0096\_Jelbart.png
- 0097\_Jorum.png
- 0098\_Jutulstraumen.png
- 0099\_Kamb.png
- 0100\_King.png
- 0101\_Knox Coast.png
- 0102\_Kohler.png
- 0103\_Lambert.png
- 0104\_Land.png
- 0105\_LarsenA.png
- 0106\_LarsenC.png

- 0107\_LarsenD.png
- 0108\_LarsenE.png
- 0109\_LarsenE Kemp Peninsula.png
- 0110\_LarsenF.png
- 0111\_LarsenF Piggot Peninsula.png
- 0112\_LarsenG.png
- 0113\_LarsenG Bowman Peninsula.png
- 0114\_LarsenG Smith Peninsula.png
- 0115\_Lauritzen.png
- 0116\_Law Dome.png
- 0117\_Lazarev.png
- 0118\_Lennox-King.png
- 0119\_Leopold and Astrid Coast.png
- 0120\_Leppard.png
- 0121\_Leverett.png
- 0122\_Lillie.png
- 0123\_Lucchitta Velasco.png
- 0124\_MacAyeal.png
- 0125\_MacRobertson Land.png
- 0126\_Mapple.png
- 0127\_Mariner.png
- 0128\_Matusevitch.png
- 0129\_Mawson Coast.png
- 0130\_Mellor.png
- 0131\_Melville.png
- 0132\_Mendelssohn.png
- 0133\_Mercer.png
- 0134\_Mertz.png
- 0135\_Minnesota.png
- 0136\_Moller.png
- 0137\_Moscow.png
- 0138\_Mulock.png
- 0139\_Nickerson.png
- 0140\_Nimrod.png
- 0141\_Ninnis.png
- 0142\_Nivl.png
- 0143\_Oates Coast1.png
- 0144\_Oates Coast2.png
- 0145\_Pequod.png
- 0146\_Philbin.png
- 0147\_Pine Island.png
- 0148\_Pope.png

- 0149\_Prestud.png
- 0150\_Prietsley-Rieves.png
- 0151\_Prince Harald.png
- 0152\_Prince Harald Coast1.png
- 0153\_Prince Harald Coast2.png
- 0154\_Prince Olav Coast.png
- 0155\_Princess Astrid Coast1.png
- 0156\_Princess Martha Coast1.png
- 0157\_Prospect.png
- 0158\_Publications.png
- 0159\_Punchbowl.png
- 0160\_Quar.png
- 0161\_Rayner Thyer.png
- 0162\_Recovery.png
- 0163\_Rennick.png
- 0164\_Richter.png
- 0165\_Riiser-Larsen.png
- 0166\_Ross East1.png
- 0167\_Ross East2.png
- 0168\_Ross East3.png
- 0169\_Ross East4.png
- 0170\_Ross East5.png
- 0171\_Ruppert Coast2.png
- 0172\_Rutford.png
- 0173\_Rydberg Peninsula.png
- 0174\_Sabrina Coast1.png
- 0175\_Sabrina Coast2.png
- 0176\_Saunders Coast.png
- 0177\_Scott.png
- 0178\_Shackleton.png
- 0179\_Shirase Glacier.png
- 0180\_Shirases Coast1.png
- 0181\_Shirases Coast2.png
- 0182\_Skelton.png
- 0183\_Slava.png
- 0184\_Slessor.png
- 0185\_Smith.png
- 0186\_Stange.png
- 0187\_Starbuck.png
- 0188\_Stubb.png
- 0189\_Sulzberger.png
- 0190\_Support Force.png

- 0191\_Thomson.png
- 0192\_Thwaites.png
- 0193\_Totten.png
- 0194\_Tracy Tremenchus.png
- 0195\_Tucker.png
- 0196\_Union.png
- 0197\_Venable.png
- 0198\_Verdi.png
- 0199\_Victoria Land1.png
- 0200\_Victoria Land2.png
- 0201\_Victoria Land3.png
- 0202\_Vigrid.png
- 0203\_Vincennes Bay.png
- 0204\_Voyeykov.png
- 0205\_Walgreen Coast.png
- 0206\_West Graham Land.png
- 0207\_Whillans.png
- 0208\_Wilhelm II Coast.png
- 0209\_Wilkes Land1.png
- 0210\_Wilkes Land2.png
- 0211\_Wilkins.png
- 0212\_Wilkins George VI.png
- 0213\_Wilkins Island1.png
- 0214\_Wilkins Island2.png
- 0215\_Wilkins Island3.png
- 0216\_Wilkins Island4.png
- 0217\_Wilkins Island5.png
- 0218\_Wilkins Island6.png
- 0219\_WilmaRobertDowner.png
- 0220\_Withrow.png
- 0221\_Zonda Eureka.png
- 0222\_1.png
- 0223\_2.png
- 0224\_3.png
- 0225\_4.png
- 0226\_5.png
- 0227\_6.png
- 0228\_7.png
- 0229\_8.png
- 0230\_9.png
- 0231\_10.png
- 0232\_11.png

- 0233\_12.png
- 0234\_13.png
- 0235\_14.png
- 0236\_15.png
- 0237\_16.png
- 0238\_17.png
- 0239\_18.png
- 0240\_19.png
- 0241\_20.png
- 0242\_21.png
- 0243\_22.png
- 0244\_23.png
- 0245\_24.png
- 0246\_25.png
- 0247\_26.png
- 0248\_27.png
- 0249\_unnamed 0005.png
- 0250\_Zephyr Glacier.png
- 0251\_unnamed 0007.png
- 0252\_unnamed 0008.png
- 0253\_unnamed 0010.png
- 0254\_Sirocco Glacier.png
- 0255\_unnamed 0012.png
- 0256\_Zonda Glacier.png
- 0257\_unnamed 0014.png
- 0258\_unnamed 0016.png
- 0259\_unnamed 0019.png
- 0260\_unnamed 0020.png
- 0261\_Carlson Glacier.png
- 0262\_unnamed 0026.png
- 0263\_unnamed 0028.png
- 0264\_unnamed 0029.png
- 0265\_unnamed 0030.png
- 0266\_Hariot Glacier.png
- 0267\_unnamed 0033.png
- 0268\_unnamed 0034.png
- 0269\_Bertrand Ice Piedmont.png
- 0270\_Dee Ice Piedmont.png
- 0271\_unnamed 0041.png
- 0272\_Glaciari Nueve de Julio.png
- 0273\_Clarke Glacier.png
- 0274\_unnamed 0055.png

- 0275\_Romulus Glacier.png
- 0276\_Martin Glacier.png
- 0277\_McMorrin Glacier.png
- 0278\_unnamed 0092.png
- 0279\_unnamed 0101.png
- 0280\_unnamed 0105.png
- 0281\_Hariot Glacier\_2.png
- 0282\_unnamed 0113.png
- 0283\_unnamed 0118.png
- 0284\_Todd Glacier.png
- 0285\_unnamed 0126.png
- 0286\_unnamed 0128.png
- 0287\_Snowshoe Glacier.png
- 0288\_Nye Glacier.png
- 0289\_unnamed 0173.png
- 0290\_unnamed 0176.png
- 0291\_unnamed 0180.png
- 0292\_Northeast Glacier.png
- 0293\_unnamed 0185.png
- 0294\_Reid Glacier.png
- 0295\_Vallot Glacier.png
- 0296\_unnamed 0192.png
- 0297\_Neny Glacier.png
- 0298\_Swithinbank Glacier.png
- 0299\_unnamed 0197.png
- 0300\_Bucher Glacier.png
- 0301\_Bader Glacier.png
- 0302\_unnamed 0206.png
- 0303\_Avsyuk Glacier.png
- 0304\_Heim Glacier.png
- 0305\_Somigliana Glacier.png
- 0306\_unnamed 0215.png
- 0307\_Lliboutry Glacier.png
- 0308\_Franca Glacier.png
- 0309\_unnamed 0222.png
- 0310\_unnamed 0225.png
- 0311\_Tofani Glacier.png
- 0312\_unnamed 0227.png
- 0313\_Daspit Glacier.png
- 0314\_Muller Ice Shelf.png
- 0315\_Mercator Ice Piedmont.png
- 0316\_unnamed 0234.png



- 0317\_unnamed 0236.png
- 0318\_unnamed 0240.png
- 0319\_unnamed 0245.png
- 0320\_unnamed 0246.png
- 0321\_Robillard Glacier.png
- 0322\_unnamed 0247.png
- 0323\_Forel Glacier.png
- 0324\_unnamed 0248.png
- 0325\_Forbes Glacier.png
- 0326\_unnamed 0249.png
- 0327\_unnamed 0253.png
- 0328\_unnamed 0256.png
- 0329\_unnamed 0260.png
- 0330\_unnamed 0261.png
- 0331\_unnamed 0262.png
- 0332\_unnamed 0264.png
- 0333\_unnamed 0266.png
- 0334\_Maitland Glacier.png
- 0335\_unnamed 0268.png
- 0336\_unnamed 0269.png
- 0337\_unnamed 0271.png
- 0338\_Barnes Glacier.png
- 0339\_unnamed 0274.png
- 0340\_unnamed 0275.png
- 0341\_Perutz Glacier.png
- 0342\_unnamed 0279.png
- 0343\_unnamed 0281.png
- 0344\_Ahlmann Glacier.png
- 0345\_unnamed 0283.png
- 0346\_unnamed 0284.png
- 0347\_Aphrodite Glacier.png
- 0348\_unnamed 0285.png
- 0349\_unnamed 0286.png
- 0350\_unnamed 0287.png
- 0351\_unnamed 0290.png
- 0352\_unnamed 0292.png
- 0353\_unnamed 0295.png
- 0354\_unnamed 0299.png
- 0355\_Pan Glacier.png
- 0356\_unnamed 0304.png
- 0357\_unnamed 0305.png
- 0358\_unnamed 0307.png

- 0359\_unnamed 0308.png
- 0360\_unnamed 0309.png
- 0361\_Lewis Glacier.png
- 0362\_unnamed 0313.png
- 0363\_unnamed 0317.png
- 0364\_Renaud Glacier.png
- 0365\_unnamed 0325.png
- 0366\_unnamed 0326.png
- 0367\_unnamed 0329.png
- 0368\_Field Glacier.png
- 0369\_Solch Glacier.png
- 0370\_Casey Glacier.png
- 0371\_Chamberlin Glacier.png
- 0372\_unnamed 0336.png
- 0373\_unnamed 0337.png
- 0374\_Cordini Glacier.png
- 0375\_unnamed 0339.png
- 0376\_unnamed 0340.png
- 0377\_Matthes Glacier.png
- 0378\_Athene Glacier.png
- 0379\_unnamed 0343.png
- 0380\_unnamed 0346.png
- 0381\_Anthony Glacier.png
- 0382\_unnamed 0347.png
- 0383\_Cronus Glacier.png
- 0384\_unnamed 0349.png
- 0385\_unnamed 0350.png
- 0386\_Lurabee Glacier.png
- 0387\_unnamed 0352.png
- 0388\_unnamed 0353.png
- 0389\_unnamed 0354.png
- 0390\_Sharp Glacier.png
- 0391\_Stefan Ice Piedmont.png
- 0392\_unnamed 0365.png
- 0393\_unnamed 0366.png
- 0394\_unnamed 0367.png
- 0395\_unnamed 0368.png
- 0396\_unnamed 0369.png
- 0397\_unnamed 0370.png
- 0398\_Demorest Glacier.png
- 0399\_unnamed 0372.png
- 0400\_unnamed 0373.png

- 0401\_unnamed 0374.png
- 0402\_unnamed 0375.png
- 0403\_unnamed 0377.png
- 0404\_unnamed 0379.png
- 0405\_unnamed 0381.png
- 0406\_unnamed 0383.png
- 0407\_Wilkinson Murphy Glacier.png
- 0408\_unnamed 0389.png
- 0409\_McCance Glacier.png
- 0410\_unnamed 0391.png
- 0411\_Flint Glacier.png
- 0412\_unnamed 0392.png
- 0413\_unnamed 0393.png
- 0414\_unnamed 0395.png
- 0415\_Widdowson Glacier.png
- 0416\_unnamed 0398.png
- 0417\_Hess Glacier.png
- 0418\_unnamed 0407.png
- 0419\_unnamed 0408.png
- 0420\_unnamed 0409.png
- 0421\_unnamed 0410.png
- 0422\_unnamed 0413.png
- 0423\_unnamed 0414.png
- 0424\_unnamed 0417.png
- 0425\_unnamed 0418.png
- 0426\_unnamed 0419.png
- 0427\_Fricker Glacier.png
- 0428\_Hopkins Glacier.png
- 0429\_unnamed 0425.png
- 0430\_Cardell Glacier.png
- 0431\_Breitfuss Glacier.png
- 0432\_Drummond Glacier.png
- 0433\_unnamed 0441.png
- 0434\_Balch Glacier.png
- 0435\_unnamed 0448.png
- 0436\_unnamed 0451.png
- 0437\_unnamed 0452.png
- 0438\_unnamed 0454.png
- 0439\_Erskine Glacier.png
- 0440\_unnamed 0456.png
- 0441\_unnamed 0459.png
- 0442\_unnamed 0461.png

- 0443\_unnamed 0463.png
- 0444\_Gould Glacier.png
- 0445\_unnamed 0468.png
- 0446\_unnamed 0469.png
- 0447\_Aagaard Glacier.png
- 0448\_Mitterling Glacier.png
- 0449\_Doyle Glacier.png
- 0450\_Simler Snowfield.png
- 0451\_unnamed 0489.png
- 0452\_Hoek Glacier.png
- 0453\_Hugi Glacier.png
- 0454\_Friederichsen Glacier.png
- 0455\_Cole Peninsula Ice Cap.png
- 0456\_unnamed 0494.png
- 0457\_unnamed 0500.png
- 0458\_unnamed 0503.png
- 0459\_Bilgeri Glacier.png
- 0460\_unnamed 0505.png
- 0461\_Weir Glacier.png
- 0462\_Beaglehole Glacier.png
- 0463\_unnamed 0514.png
- 0464\_unnamed 0521.png
- 0465\_Lawrie Glacier.png
- 0466\_Sleipnir Glacier.png
- 0467\_unnamed 0525.png
- 0468\_Anderson Glacier.png
- 0469\_Otlet Glacier.png
- 0470\_unnamed 0530.png
- 0471\_unnamed 0550.png
- 0472\_Birley Glacier.png
- 0473\_unnamed 0559.png
- 0474\_unnamed 0569.png
- 0475\_unnamed 0576.png
- 0476\_unnamed 0578.png
- 0477\_Comrie Glacier.png
- 0478\_unnamed 0584.png
- 0479\_unnamed 0585.png
- 0480\_unnamed 0586.png
- 0481\_unnamed 0587.png
- 0482\_unnamed 0588.png
- 0483\_Luke Glacier.png
- 0484\_unnamed 0593.png

- 0485\_Churchill Peninsula Ice Cap a.png
- 0486\_Churchill Peninsula Ice Cap a\_2.png
- 0487\_Eden Glacier.png
- 0488\_Lind Glacier.png
- 0489\_unnamed 0607.png
- 0490\_Churchill Peninsula Ice Cap b.png
- 0491\_unnamed 0611.png
- 0492\_unnamed 0614.png
- 0493\_unnamed 0615.png
- 0494\_Cadman Glacier.png
- 0495\_unnamed 0618.png
- 0496\_unnamed 0622.png
- 0497\_Bussey Glacier.png
- 0498\_unnamed 0625.png
- 0499\_Wiggins Glacier.png
- 0500\_Funk Glacier.png
- 0501\_Lever Glacier.png
- 0502\_Leay Glacier.png
- 0503\_unnamed 0642.png
- 0504\_unnamed 0646.png
- 0505\_Trooz Glacier.png
- 0506\_unnamed 0647.png
- 0507\_unnamed 0651.png
- 0508\_Philippi Rise.png
- 0509\_unnamed 0655.png
- 0510\_unnamed 0656.png
- 0511\_Leppard Glacier.png
- 0512\_Niepce Glacier.png
- 0513\_unnamed 0658.png
- 0514\_unnamed 0659.png
- 0515\_unnamed 0666.png
- 0516\_unnamed 0667.png
- 0517\_Philippi Rise\_2.png
- 0518\_unnamed 0671.png
- 0519\_unnamed 0672.png
- 0520\_Talbot Glacier.png
- 0521\_unnamed 0681.png
- 0522\_unnamed 0687.png
- 0523\_unnamed 0697.png
- 0524\_Flask Glacier.png
- 0525\_unnamed 0707.png
- 0526\_unnamed 0710.png

- 0527\_Archer Glacier.png
- 0528\_unnamed 0714.png
- 0529\_unnamed 0721.png
- 0530\_unnamed 0722.png
- 0531\_Vogel Glacier.png
- 0532\_Miethe Glacier.png
- 0533\_unnamed 0740.png
- 0534\_Stubb Glacier.png
- 0535\_Starbuck Glacier.png
- 0536\_unnamed 0757.png
- 0537\_unnamed 0761.png
- 0538\_unnamed 0765.png
- 0539\_Rachel Glacier.png
- 0540\_Sayce Glacier.png
- 0541\_Petzval Glacier.png
- 0542\_Bolton Glacier.png
- 0543\_unnamed 0777.png
- 0544\_Goodwin Glacier.png
- 0545\_Mapple Glacier.png
- 0546\_Melville Glacier.png
- 0547\_unnamed 0784.png
- 0548\_unnamed 0787.png
- 0549\_Pequod Glacier.png
- 0550\_unnamed 0797.png
- 0551\_unnamed 0800.png
- 0552\_unnamed 0810.png
- 0553\_unnamed 0813.png
- 0554\_unnamed 0816.png
- 0555\_unnamed 0819.png
- 0556\_unnamed 0820.png
- 0557\_unnamed 0823.png
- 0558\_Crane Glacier.png
- 0559\_unnamed 0829.png
- 0560\_unnamed 0833.png
- 0561\_unnamed 0840.png
- 0562\_unnamed 0843.png
- 0563\_unnamed 0851.png
- 0564\_Bagshawe Glacier.png
- 0565\_unnamed 0855.png
- 0566\_unnamed 0858.png
- 0567\_unnamed 0866.png
- 0568\_Jorum Glacier.png

- 0569\_unnamed 0871.png
- 0570\_Rudolph Glacier.png
- 0571\_unnamed 0875.png
- 0572\_Deville Glacier.png
- 0573\_unnamed 0879.png
- 0574\_Arago Glacier.png
- 0575\_unnamed 0882.png
- 0576\_Wheatstone Glacier.png
- 0577\_Punchbowl Glacier.png
- 0578\_Moser Glacier.png
- 0579\_unnamed 0894.png
- 0580\_Woodbury Glacier.png
- 0581\_unnamed 0902.png
- 0582\_unnamed 0924.png
- 0583\_Montgolfier Glacier.png
- 0584\_unnamed 0934.png
- 0585\_unnamed 0936.png
- 0586\_unnamed 0937.png
- 0587\_Rozier Glacier.png
- 0588\_Evans Glacier.png
- 0589\_Blanchard Glacier.png
- 0590\_unnamed 0954.png
- 0591\_unnamed 0978.png
- 0592\_Leonardo Glacier.png
- 0593\_unnamed 0987.png
- 0594\_Bayly Glacier.png
- 0595\_unnamed 0992.png
- 0596\_unnamed 0996.png
- 0597\_unnamed 0998.png
- 0598\_unnamed 1001.png
- 0599\_unnamed 1006.png
- 0600\_Hektoria Glacier.png
- 0601\_unnamed 1029.png
- 0602\_unnamed 1035.png
- 0603\_unnamed 1037.png
- 0604\_unnamed 1043.png
- 0605\_unnamed 1064.png
- 0606\_Nobile Glacier.png
- 0607\_unnamed 1071.png
- 0608\_Wellman Glacier.png
- 0609\_unnamed 1073.png
- 0610\_unnamed 1076.png

- 0611\_unnamed 1088.png
- 0612\_unnamed 1090.png
- 0613\_unnamed 1093.png
- 0614\_Bleriot Glacier.png
- 0615\_Drygalski Glacier.png
- 0616\_unnamed 1102.png
- 0617\_unnamed 1105.png
- 0618\_unnamed 1111.png
- 0619\_unnamed 1115.png
- 0620\_unnamed 1116.png
- 0621\_Mouillard Glacier.png
- 0622\_unnamed 1123.png
- 0623\_Gregory Glacier.png
- 0624\_Sikorsky Glacier.png
- 0625\_unnamed 1127.png
- 0626\_unnamed 1128.png
- 0627\_Cayley Glacier.png
- 0628\_unnamed 1132.png
- 0629\_unnamed 1133.png
- 0630\_unnamed 1134.png
- 0631\_unnamed 1135.png
- 0632\_Breguet Glacier.png
- 0633\_unnamed 1138.png
- 0634\_unnamed 1139.png
- 0635\_unnamed 1166.png
- 0636\_unnamed 1168.png
- 0637\_unnamed 1170.png
- 0638\_unnamed 1171.png
- 0639\_unnamed 1172.png
- 0640\_Edgeworth Glacier.png
- 0641\_unnamed 1174.png
- 0642\_unnamed 1177.png
- 0643\_unnamed 1179.png
- 0644\_unnamed 1180.png
- 0645\_Temple Glacier.png
- 0646\_unnamed 1185.png
- 0647\_unnamed 1186.png
- 0648\_Pyke Glacier.png
- 0649\_unnamed 1187.png
- 0650\_unnamed 1188.png
- 0651\_Andrew Glacier.png
- 0652\_Whitecloud Glacier.png



- 0653\_unnamed 1192.png
- 0654\_Sjogren Glacier.png
- 0655\_unnamed 1196.png
- 0656\_unnamed 1197.png
- 0657\_unnamed 1198.png
- 0658\_Boydell Glacier.png
- 0659\_unnamed 1199.png
- 0660\_McNeile Glacier.png
- 0661\_unnamed 1204.png
- 0662\_Boydell Glacier\_2.png
- 0663\_unnamed 1205.png
- 0664\_unnamed 1206.png
- 0665\_unnamed 1207.png
- 0666\_unnamed 1208.png
- 0667\_unnamed 1209.png
- 0668\_unnamed 1211.png
- 0669\_Diplock Glacier.png
- 0670\_Aitkenhead Glacier.png
- 0671\_unnamed 1219.png
- 0672\_unnamed 1220.png
- 0673\_unnamed 1222.png
- 0674\_unnamed 1226.png
- 0675\_unnamed 1228.png
- 0676\_unnamed 1230.png
- 0677\_unnamed 1235.png
- 0678\_Victory Glacier.png
- 0679\_unnamed 1241.png
- 0680\_Russell West Glacier.png
- 0681\_unnamed 1248.png
- 0682\_Russell East Glacier.png
- 0683\_unnamed 1251.png
- 0684\_unnamed 1257.png
- 0685\_unnamed 1260.png
- 0686\_unnamed 1265.png
- 0687\_unnamed 1268.png
- 0688\_unnamed 1269.png
- 0689\_unnamed 1273.png
- 0690\_unnamed 1277.png
- 0691\_unnamed 1287.png
- 0692\_unnamed 1289.png
- 0693\_unnamed 1290.png
- 0694\_Broad Valley Glacier.png

- 0695\_unnamed 1305.png
- 0696\_unnamed 1307.png
- 0697\_unnamed 1308.png
- 0698\_unnamed 1311.png
- 0699\_unnamed 1315.png
- 0700\_unnamed 1316.png
- 0701\_unnamed 1317.png
- 0702\_unnamed 1319.png
- 0703\_Mondor Glacier.png
- 0704\_unnamed 1323.png
- 0705\_unnamed 1326.png
- 0706\_Arena Glacier.png
- 0707\_unnamed 1329.png
- 0708\_unnamed 1331.png
- 0709\_unnamed 1335.png
- 0710\_unnamed 1338.png
- 0711\_unnamed 1376.png
- 0712\_unnamed 1377.png
- 0713\_unnamed 1378.png
- 0714\_unnamed 1379.png
- 0715\_unnamed 1380.png
- 0716\_unnamed 1381.png
- 0717\_unnamed 1382.png
- 0718\_unnamed 1383.png
- 0719\_unnamed 1384.png
- 0720\_unnamed 1385.png
- 0721\_unnamed 1386.png
- 0722\_unnamed 1387.png
- 0723\_unnamed 1388.png
- 0724\_unnamed 1389.png
- 0725\_unnamed 1390.png
- 0726\_unnamed 1391.png
- 0727\_unnamed 1392.png
- 0728\_unnamed 1393.png
- 0729\_unnamed 1394.png
- 0730\_unnamed 1395.png
- 0731\_unnamed 1396.png
- 0732\_unnamed 1397.png
- 0733\_unnamed 1398.png
- 0734\_unnamed 1399.png
- 0735\_unnamed 1400.png
- 0736\_unnamed 1401.png

- 0737\_unnamed 1402.png
- 0738\_unnamed 1403.png
- 0739\_unnamed 1404.png
- 0740\_unnamed 1405.png
- 0741\_unnamed 1406.png
- 0742\_unnamed 1407.png
- 0743\_unnamed 1408.png
- 0744\_unnamed 1409.png
- 0745\_unnamed 1410.png
- 0746\_unnamed 1411.png
- 0747\_unnamed 1412.png
- 0748\_unnamed 1413.png
- 0749\_unnamed 1414.png
- 0750\_unnamed 1415.png
- 0751\_unnamed 1417.png
- 0752\_unnamed 1418.png
- 0753\_unnamed 1419.png
- 0754\_unnamed 1420.png
- 0755\_unnamed 1422.png
- 0756\_unnamed 1425.png
- 0757\_unnamed 1426.png
- 0758\_unnamed 1427.png
- 0759\_unnamed 1428.png
- 0760\_unnamed 1429.png
- 0761\_unnamed 1430.png
- 0762\_unnamed 1431.png
- 0763\_unnamed 1432.png
- 0764\_unnamed 1433.png
- 0765\_unnamed 1434.png
- 0766\_unnamed 1435.png
- 0767\_unnamed 1436.png
- 0768\_unnamed 1437.png
- 0769\_unnamed 1438.png
- 0770\_unnamed 1439.png
- 0771\_unnamed 1440.png
- 0772\_unnamed 1441.png
- 0773\_unnamed 1442.png
- 0774\_unnamed 1443.png
- 0775\_unnamed 1444.png
- 0776\_unnamed 1445.png
- 0777\_unnamed 1446.png
- 0778\_unnamed 1447.png

- 0779\_unnamed 1448.png
- 0780\_unnamed 1449.png
- 0781\_unnamed 1450.png
- 0782\_unnamed 1451.png
- 0783\_unnamed 1452.png
- 0784\_unnamed 1453.png
- 0785\_unnamed 1454.png
- 0786\_unnamed 1455.png
- 0787\_unnamed 1456.png
- 0788\_unnamed 1457.png
- 0789\_unnamed 1458.png
- 0790\_unnamed 1459.png
- 0791\_unnamed 1460.png
- 0792\_unnamed 1461.png
- 0793\_unnamed 1462.png
- 0794\_unnamed 1463.png
- 0795\_unnamed 1464.png
- 0796\_unnamed 1466.png
- 0797\_unnamed 1468.png
- 0798\_unnamed 1469.png
- 0799\_unnamed 1470.png
- 0800\_unnamed 1471.png
- 0801\_unnamed 1472.png
- 0802\_unnamed 1473.png
- 0803\_unnamed 1474.png
- 0804\_unnamed 1475.png
- 0805\_unnamed 1476.png
- 0806\_unnamed 1477.png
- 0807\_unnamed 1478.png
- 0808\_unnamed 1479.png
- 0809\_unnamed 1480.png
- 0810\_unnamed 1481.png
- 0811\_unnamed 1482.png
- 0812\_unnamed 1483.png
- 0813\_unnamed 1484.png
- 0814\_unnamed 1485.png
- 0815\_unnamed 1486.png
- 0816\_unnamed 1487.png
- 0817\_unnamed 1488.png
- 0818\_unnamed 1489.png
- 0819\_unnamed 1490.png
- 0820\_unnamed 1491.png

- 0821\_unnamed 1492.png
- 0822\_unnamed 1493.png
- 0823\_unnamed 1494.png
- 0824\_unnamed 1495.png
- 0825\_unnamed 1496.png
- 0826\_unnamed 1497.png
- 0827\_unnamed 1498.png
- 0828\_unnamed 1499.png
- 0829\_unnamed 1500.png
- 0830\_unnamed 1501.png
- 0831\_unnamed 1502.png
- 0832\_unnamed 1503.png
- 0833\_unnamed 1504.png
- 0834\_unnamed 1505.png
- 0835\_unnamed 1506.png
- 0836\_unnamed 1507.png
- 0837\_unnamed 1508.png
- 0838\_unnamed 1509.png
- 0839\_unnamed 1510.png
- 0840\_Abbot\_IS.png
- 0841\_Ainsworth\_IS.png
- 0842\_Alison\_IS.png
- 0843\_Amery\_IS.png
- 0844\_Andreyev\_IS.png
- 0845\_Astrolabe\_IS.png
- 0846\_Atka\_IS.png
- 0847\_Aviator\_IS.png
- 0848\_Bach\_IS.png
- 0849\_Barber\_IS.png
- 0850\_Baudouin\_IS.png
- 0851\_Borchgrevink\_IS.png
- 0852\_Brahms\_IS.png
- 0853\_Britten\_IS.png
- 0854\_Brunt\_Stancomb\_IS.png
- 0855\_Campbell\_IS.png
- 0856\_Cape\_Washington\_IS.png
- 0857\_Cheetham\_IS.png
- 0858\_Chugunov\_IS.png
- 0859\_Cirque\_Fjord\_IS.png
- 0860\_Clarke\_Bay\_IS.png
- 0861\_Commandant\_Charcot\_IS.png
- 0862\_Conger\_Glenzer\_IS.png

- 0863\_Cook\_IS.png
- 0864\_Cosgrove\_IS.png
- 0865\_Crosson\_IS.png
- 0866\_Dalk\_IS.png
- 0867\_Dawson\_Lambton\_IS.png
- 0868\_Deakin\_IS.png
- 0869\_Dennistoun\_IS.png
- 0870\_Dibble\_IS.png
- 0871\_Dotson\_IS.png
- 0872\_Drury\_IS.png
- 0873\_Drygalski\_IS.png
- 0874\_Edward\_VIII\_IS.png
- 0875\_Ekstrom\_IS.png
- 0876\_Eltanin\_Bay\_IS.png
- 0877\_Falkner\_IS.png
- 0878\_Ferrigno\_IS.png
- 0879\_Filchner\_IS.png
- 0880\_Fimbul\_IS.png
- 0881\_Fisher\_IS.png
- 0882\_Fitzgerald\_IS.png
- 0883\_Flatnes\_IS.png
- 0884\_Fox\_Ice\_Stream\_IS.png
- 0885\_Francais\_IS.png
- 0886\_Frost\_IS.png
- 0887\_Gannutz\_IS.png
- 0888\_Garfield\_IS.png
- 0889\_Geikie\_Inlet\_IS.png
- 0890\_George\_VI\_IS.png
- 0891\_Getz\_IS.png
- 0892\_Gillet\_IS.png
- 0893\_Hamilton\_IS.png
- 0894\_Hannan\_IS.png
- 0895\_Harbord\_Glacier\_IS.png
- 0896\_Hayes\_Coats\_Coast\_IS.png
- 0897\_Helen\_IS.png
- 0898\_Holmes\_IS.png
- 0899\_HornBluff\_IS.png
- 0900\_Hoseason\_IS.png
- 0901\_Hovde\_IS.png
- 0902\_Hull\_IS.png
- 0903\_Ironside\_IS.png
- 0904\_Jackson\_IS.png

- 0905\_Jelbart\_IS.png
- 0906\_Kirkby\_IS.png
- 0907\_Land\_IS.png
- 0908\_Larsen\_A\_IS.png
- 0909\_Larsen\_B\_IS.png
- 0910\_Larsen\_C\_IS.png
- 0911\_Larsen\_D\_IS.png
- 0912\_Larsen\_E\_IS.png
- 0913\_Larsen\_F\_IS.png
- 0914\_Larsen\_G\_IS.png
- 0915\_Lauritzen\_IS.png
- 0916\_Lazarev\_IS.png
- 0917\_Liotard\_IS.png
- 0918\_Lillie\_IS.png
- 0919\_Mandible\_Cirque\_IS.png
- 0920\_Manhaul\_IS.png
- 0921\_Marin\_IS.png
- 0922\_Mariner\_IS.png
- 0923\_Marret\_IS.png
- 0924\_Matusevitch\_IS.png
- 0925\_May\_Glacier\_IS.png
- 0926\_Mcleod\_IS.png
- 0927\_Mendelssohn\_IS.png
- 0928\_Mertz\_IS.png
- 0929\_Morse\_IS.png
- 0930\_Moscow\_University\_IS.png
- 0931\_Moubray\_IS.png
- 0932\_Mulebreen\_IS.png
- 0933\_Myers\_IS.png
- 0934\_Nansen\_IS.png
- 0935\_Nickerson\_IS.png
- 0936\_Ninnis\_IS.png
- 0937\_Nivl\_IS.png
- 0938\_Noll\_IS.png
- 0939\_Nordenskjold\_IS.png
- 0940\_Parker\_IS.png
- 0941\_Perkins\_IS.png
- 0942\_Philbin\_Inlet\_IS.png
- 0943\_Pine\_Island\_IS.png
- 0944\_Porter\_IS.png
- 0945\_Pourquoi\_Pas\_IS.png
- 0946\_Prince\_Harald\_IS.png

- 0947\_Publications\_IS.png
- 0948\_Quar\_IS.png
- 0949\_Quatermain\_Point\_IS.png
- 0950\_Rayner\_Thyer\_IS.png
- 0951\_Rennick\_IS.png
- 0952\_Richter\_IS.png
- 0953\_Riiser\_Larsen\_IS.png
- 0954\_Ronne\_IS.png
- 0955\_Rose\_Point\_IS.png
- 0956\_Ross\_East\_IS.png
- 0957\_Ross\_West\_IS.png
- 0958\_Rund\_Bay\_IS.png
- 0959\_Rydberg\_Peninsula\_1\_IS.png
- 0960\_Rydberg\_Peninsula\_2\_IS.png
- 0961\_Sandford\_IS.png
- 0962\_Shackleton\_IS.png
- 0963\_Shirase\_IS.png
- 0964\_Skallen\_IS.png
- 0965\_Slava\_IS.png
- 0966\_Smith\_Inlet\_IS.png
- 0967\_Sorsdal\_IS.png
- 0968\_Stange\_IS.png
- 0969\_Sulzberger\_IS.png
- 0970\_Suter\_IS.png
- 0971\_Suvorov\_IS.png
- 0972\_Swinburne\_IS.png
- 0973\_Telen\_IS.png
- 0974\_Thomson\_IS.png
- 0975\_Thwaites\_IS.png
- 0976\_Tinker\_IS.png
- 0977\_Totten\_IS.png
- 0978\_Tracy\_Tremenchus\_IS.png
- 0979\_Tucker\_IS.png
- 0980\_Underwood\_IS.png
- 0981\_Utsikkar\_IS.png
- 0982\_Venable\_IS.png
- 0983\_Verdi\_IS.png
- 0984\_Vigrid\_IS.png
- 0985\_Vincennes\_Bay\_IS.png
- 0986\_Voyeykov\_IS.png
- 0987\_Walgreen\_Coast\_1\_IS.png
- 0988\_Walgreen\_Coast\_2\_IS.png



- 0989\_Watt\_Bay\_IS.png
- 0990\_West\_IS.png
- 0991\_Whittle\_IS.png
- 0992\_Wilkins\_IS.png
- 0993\_Wilma\_Robert\_Downer\_IS.png
- 0994\_Withrow\_IS.png
- 0995\_Wordie\_IS.png
- 0996\_Wylde\_IS.png
- 0997\_Zelee\_IS.png
- 0998\_Zubchatyy\_IS.png

The copyright of individual parts of the supplement might differ from the article licence.
