# Supplementary material for: Antarctic Ice Sheet grounding line discharge from 1996–2024
Source: Copernicus journal article supplement (doi:10.5194/essd-17-3259-2025), 2025-07-07
Supplement: Supplementary file 1 [file essd-17-3259-2025-supplement.zip]

## Sheet: Sheet1
Basin Name	Davison discharge (Gt/yr)	Davison error (Gt/yr)	Other discharge (Gt/yr)	Other error (Gt/yr)	Difference (Gt/yr)	Difference (%)	Other source
Antarctica	2082.59	45.16	1894	43	188.59	9.06	Gardner (2007-2009)
West Antarctica	853.26	21.17	724	24	129.26	15.15	Gardner (2007-2009)
East Antarctica	960.53	28.12	952	31	8.53	0.89	Gardner (2007-2009)
Antarctic Peninsula	268.04	3.17	217	15	51.04	19.04	Gardner (2007-2009)
1	161.99	11.78	110	8	51.99	32.09	Gardner (2007-2009)
2	60.77	7.8	48	6	12.77	21.01	Gardner (2007-2009)
3	47.84	0.99	59	4	-11.16	-23.34	Gardner (2007-2009)
4	47.98	1.35	41	8	6.98	14.56	Gardner (2007-2009)
5	36.25	1.71	30	5	6.25	17.25	Gardner (2007-2009)
6	60.16	0.58	60	7	0.16	0.27	Gardner (2007-2009)
7	55.09	2.02	68	8	-12.91	-23.43	Gardner (2007-2009)
8	19.71	3.36	17	4	2.71	13.77	Gardner (2007-2009)
9	17	0.51	17	3	0	0.03	Gardner (2007-2009)
10	44.17	1.33	34	4	10.17	23.02	Gardner (2007-2009)
11	12.97	2.15	13	3	-0.03	-0.22	Gardner (2007-2009)
12	116.94	3.79	102	11	14.94	12.77	Gardner (2007-2009)
13	234.14	14.13	226	19	8.14	3.48	Gardner (2007-2009)
14	125.67	14.18	130	10	-4.33	-3.44	Gardner (2007-2009)
15	17.04	1.17	26	6	-8.96	-52.55	Gardner (2007-2009)
16	10.8	0.46	13	2	-2.2	-20.38	Gardner (2007-2009)
17	63.95	1.32	67	8	-3.05	-4.77	Gardner (2007-2009)
18	22.45	0.94	9	3	13.45	59.92	Gardner (2007-2009)
19	57.6	3.08	44	6	13.6	23.61	Gardner (2007-2009)
20	156.12	2.15	171	15	-14.88	-9.53	Gardner (2007-2009)
21	186.89	6.21	180	12	6.89	3.69	Gardner (2007-2009)
22	134.29	1.5	127	8	7.29	5.43	Gardner (2007-2009)
23	88.65	1.85	83	8	5.65	6.37	Gardner (2007-2009)
24	93.05	1.88	94	7	-0.95	-1.02	Gardner (2007-2009)
25	83.8	2.2	88	13	-4.2	-5.01	Gardner (2007-2009)
26	41.84	0.9	23	4	18.84	45.03	Gardner (2007-2009)
27	9.95	0.51	12	3	-2.05	-20.59	Gardner (2007-2009)
Antarctica	2117.47	55.43	1929	40	188.47	8.9	Gardner (2015)
West Antarctica	874.95	27	754	23	120.95	13.82	Gardner (2015)
East Antarctica	961.53	31	952	29	9.53	0.99	Gardner (2015)
Antarctic Peninsula	275.6	4.69	223	14	52.6	19.08	Gardner (2015)
1	162.2	14.43	112	7	50.2	30.95	Gardner (2015)
2	62.52	10.09	47	4	15.52	24.83	Gardner (2015)
3	47.46	0.84	60	4	-12.54	-26.41	Gardner (2015)
4	48.77	1.27	43	7	5.77	11.82	Gardner (2015)
5	35.91	1.92	31	4	4.91	13.67	Gardner (2015)
6	58.86	0.7	60	6	-1.14	-1.94	Gardner (2015)
7	55.39	2.12	70	8	-14.61	-26.37	Gardner (2015)
8	19.84	4.14	18	3	1.84	9.26	Gardner (2015)
9	16.79	0.64	16	2	0.79	4.71	Gardner (2015)
10	44.1	1.54	33	3	11.1	25.17	Gardner (2015)
11	13	2.66	12	2	1	7.66	Gardner (2015)
12	117.84	4.86	101	10	16.84	14.29	Gardner (2015)
13	234.29	16.21	223	18	11.29	4.82	Gardner (2015)
14	127.28	17.8	130	10	-2.72	-2.14	Gardner (2015)
15	17.1	1.28	26	5	-8.9	-52.06	Gardner (2015)
16	10.99	0.56	14	2	-3.01	-27.33	Gardner (2015)
17	63.41	1.52	67	7	-3.59	-5.66	Gardner (2015)
18	23.19	1.22	8	2	15.19	65.5	Gardner (2015)
19	56.97	3.79	45	6	11.97	21.01	Gardner (2015)
20	162.12	2.81	183	14	-20.88	-12.88	Gardner (2015)
21	199.14	9.11	189	12	10.14	5.09	Gardner (2015)
22	135.79	2.04	134	8	1.79	1.32	Gardner (2015)
23	89.2	2.34	83	7	6.2	6.95	Gardner (2015)
24	95.96	2.75	95	7	0.96	1	Gardner (2015)
25	85.25	2.31	91	12	-5.75	-6.74	Gardner (2015)
26	42.39	0.72	25	3	17.39	41.02	Gardner (2015)
27	10.48	0.69	12	2	-1.52	-14.48	Gardner (2015)
Abbot	34.86	1.4	28	7	6.86	19.67	Depoorter (2007-2009)
Brunt and Riiser-Larsen	40.29	0.41	48	12	-7.71	-19.15	Depoorter (2007-2009)
Cook	34.06	0.75	33	3	1.06	3.12	Depoorter (2007-2009)
Cosgrove	6.22	0.1	11	3	-4.78	-76.74	Depoorter (2007-2009)
Crosson and Dotson	63.98	3.82	51	5	12.98	20.29	Depoorter (2007-2009)
Drygalski	2.54	0.41	8	1	-5.46	-214.96	Depoorter (2007-2009)
Filchner-Ronne	293.38	13.32	230	31	63.38	21.6	Depoorter (2007-2009)
Getz	93.03	2.01	92	10	1.03	1.11	Depoorter (2007-2009)
Jelbart and Fimbul	37.58	1.34	40	11	-2.42	-6.44	Depoorter (2007-2009)
Land	14.05	0.51	16	3	-1.95	-13.92	Depoorter (2007-2009)
Larsen B-C	30.38	0.85	16	2	14.38	47.33	Depoorter (2007-2009)
Mertz	15.72	1.98	20	4	-4.28	-27.2	Depoorter (2007-2009)
Moscow University	48.71	1.06	47	6	1.71	3.52	Depoorter (2007-2009)
Ninnis	21.88	0.36	22	2	-0.12	-0.53	Depoorter (2007-2009)
Pine Island	133.63	1.43	110	11	23.63	17.68	Depoorter (2007-2009)
Rennick	5.47	0.25	5	2	0.47	8.53	Depoorter (2007-2009)
Ross	144.35	4.45	120	15	24.35	16.87	Depoorter (2007-2009)
Shackleton	40.37	0.86	48	9	-7.63	-18.89	Depoorter (2007-2009)
Sulzberger	16.19	0.32	21	5	-4.81	-29.71	Depoorter (2007-2009)
Thwaites	121.42	2.78	102	10	19.42	15.99	Depoorter (2007-2009)
Totten	82.13	10.42	81	9	1.13	1.38	Depoorter (2007-2009)
Venable	15.01	0.33	13	1	2.01	13.37	Depoorter (2007-2009)
Antarctica	2073.24	180.11	2142.62	214.26	-112.6	-5.43	Rignot (1996-2017)
West Antarctica	840.26	70.89	720.28	72.03	85.19	10.14	Rignot (1996-2017)
East Antarctica	962.02	83.04	1106.03	110.6	-140.13	-14.57	Rignot (1996-2017)
Antarctic Peninsula	269.89	26.11	316.31	31.63	-58.73	-21.76	Rignot (1996-2017)
Abbot	34.6	3.07	31.63	3.16	1.85	5.35	Rignot (1996-2017)
Academy	20.57	1.69	23.86	2.39	-3.09	-15.01	Rignot (1996-2017)
Adelie Coast	22.45	1.98	26.62	2.66	-4.17	-18.58	Rignot (1996-2017)
Airy Rotz Seller	2.99	0.3	2.35	0.24	0.5	16.64	Rignot (1996-2017)
Alison	6.6	0.59	7.2	0.72	-0.6	-9.11	Rignot (1996-2017)
American HighLand	13.23	1.03	13.68	1.37	-0.35	-2.65	Rignot (1996-2017)
Amery_IS	74.18	4.92	76.97	7.7	-2.99	-4.03	Rignot (1996-2017)
Amundsen	1.74	0.15	3.09	0.31	-1.35	-77.6	Rignot (1996-2017)
Atka	0.96	0.08	0.85	0.09	0.11	11.15	Rignot (1996-2017)
Aviator	0.77	0.06	1.06	0.11	-0.29	-37.95	Rignot (1996-2017)
Bach	6.52	0.62	5.1	0.51	1.42	21.78	Rignot (1996-2017)
Bailey	10.95	0.97	8.87	0.89	2.33	21.32	Rignot (1996-2017)
Baudouin	22.2	1.99	27.4	2.74	-4.97	-22.39	Rignot (1996-2017)
Beardmore	3.9	0.4	6.28	0.63	-2.28	-58.42	Rignot (1996-2017)
Bindschadler	19.85	1.89	16.07	1.61	4.26	21.46	Rignot (1996-2017)
Borchgrevink	19.96	1.94	21.01	2.1	-0.48	-2.4	Rignot (1996-2017)
Bowman Strom Live Axel-Heigerg	2.78	0.25	3.33	0.33	-0.55	-19.97	Rignot (1996-2017)
Brahms	1	0.1	0.92	0.09	0.08	7.85	Rignot (1996-2017)
Brunt Stancomb	23.39	1.96	21.59	2.16	2.15	9.19	Rignot (1996-2017)
Budd Coast	3.7	0.38	7.79	0.78	-4.09	-110.57	Rignot (1996-2017)
Butler-Swinburne	3.27	0.26	3.14	0.31	0.13	4.08	Rignot (1996-2017)
Byrd	19.12	1.53	22.27	2.23	-3.09	-16.13	Rignot (1996-2017)
Campbell-Tinker	0.71	0.05	1.05	0.1	-0.34	-48.9	Rignot (1996-2017)
Cape Jeremy	1.3	0.15	1.26	0.13	0.05	3.68	Rignot (1996-2017)
Carlson	9.25	0.72	9.25	0.93	-0.56	-6.09	Rignot (1996-2017)
Clarie Coast	10.1	1.07	12.7	1.27	-2.6	-25.72	Rignot (1996-2017)
Coats Coast	6.54	0.68	6.43	0.64	0.11	1.75	Rignot (1996-2017)
Conger Glenzer	1.13	0.14	2.17	0.22	-1.04	-91.85	Rignot (1996-2017)
Cook	34.13	2.86	39.42	3.94	-6.53	-19.12	Rignot (1996-2017)
Cooke	0.62	0.06	0.42	0.04	0.19	31.42	Rignot (1996-2017)
Cosgrove	6.11	0.59	5.21	0.52	0.85	13.95	Rignot (1996-2017)
Crane	1.88	0.16	1.54	0.15	-0.01	-0.64	Rignot (1996-2017)
Crosson_IS	32.63	3.04	20.84	2.08	7.12	21.83	Rignot (1996-2017)
D Orville Coast	5.13	0.44	8.66	0.87	-3.53	-68.67	Rignot (1996-2017)
David	7.82	0.73	3.5	0.35	2.55	32.56	Rignot (1996-2017)
David	7.82	0.73	9.67	0.97	-1.77	-22.61	Rignot (1996-2017)
Denman Scott	39.8	3.12	57.59	5.76	-18.48	-46.42	Rignot (1996-2017)
Dibble	14.67	1.23	18.86	1.89	-5.15	-35.11	Rignot (1996-2017)
Dotson_IS	29.95	2.56	21.74	2.17	4.77	15.93	Rignot (1996-2017)
Dry Valleys	0.77	0.08	1.53	0.15	-0.76	-98.82	Rignot (1996-2017)
Drygalskis Headland	0.1	0.01	0.05	0	0.06	53.67	Rignot (1996-2017)
Eastern Graham Land	5.23	0.62	3.32	0.33	1.91	36.51	Rignot (1996-2017)
Echelmeyer	2.82	0.28	1.87	0.19	1.12	39.73	Rignot (1996-2017)
Edward VIII	1.85	0.16	3.83	0.38	-1.98	-107.53	Rignot (1996-2017)
Ekstrom	4.52	0.36	4.59	0.46	0.02	0.44	Rignot (1996-2017)
Enderby Land	11.09	1.06	18.83	1.88	-7.74	-69.86	Rignot (1996-2017)
Evans	63.22	5.17	52.27	5.23	12.32	19.49	Rignot (1996-2017)
Evans Headland	0.11	0.01	0.04	0	0.07	62.41	Rignot (1996-2017)
Ferrigno	14.33	1.26	12.88	1.29	0.72	5.02	Rignot (1996-2017)
Filchner_IS	106.39	8.52	109.02	10.9	-0.93	-0.88	Rignot (1996-2017)
Fisher	7.37	0.48	5.35	0.53	2.07	28.11	Rignot (1996-2017)
Flask	1.51	0.12	1.1	0.11	0.29	19.26	Rignot (1996-2017)
Fleming	8.27	0.7	9.84	0.98	-2.37	-28.72	Rignot (1996-2017)
Foundation	34.75	3.39	17.58	1.76	17.29	49.75	Rignot (1996-2017)
Fox	8.56	0.78	7.31	0.73	-0.03	-0.36	Rignot (1996-2017)
Frost	30.3	2.57	47.83	4.78	-17.3	-57.11	Rignot (1996-2017)
Frostman-Lord-Shuman-Anandakri	5.65	0.52	6.19	0.62	-0.54	-9.62	Rignot (1996-2017)
George VI	68.17	5.98	75.81	7.58	-10.67	-15.65	Rignot (1996-2017)
Getz	93.64	7.06	82.52	8.25	4.02	4.29	Rignot (1996-2017)
Hamilton	0.4	0.04	0.43	0.04	-0.03	-7.65	Rignot (1996-2017)
Harriott	2.32	0.26	1.9	0.19	0.37	15.9	Rignot (1996-2017)
Harriott Headland	0.35	0.02	0.6	0.06	-0.25	-72.43	Rignot (1996-2017)
Haynes	11.06	1.07	11.6	1.16	-1.08	-9.79	Rignot (1996-2017)
Hektoria Green Evans	7.73	0.99	4.46	0.45	0.59	7.58	Rignot (1996-2017)
Hektoria Headland	0.36	0.04	0.29	0.03	0.07	18.59	Rignot (1996-2017)
Hercules	1.72	0.14	1.87	0.19	-0.15	-8.75	Rignot (1996-2017)
Holmes	24.64	2.38	20.74	2.07	3.08	12.48	Rignot (1996-2017)
Hp-I	133.82	12.05	15.37	1.54	118.45	88.51	Rignot (1996-2017)
Hull	13.31	1.08	10.34	1.03	2.71	20.38	Rignot (1996-2017)
Icebreaker-Fitzgerald	0.19	0.01	0.45	0.04	-0.26	-142.17	Rignot (1996-2017)
Ingrid Christensen Coast	7.69	0.81	12.17	1.22	-4.48	-58.25	Rignot (1996-2017)
Institute	29.4	2.52	25.2	2.52	4.08	13.89	Rignot (1996-2017)
Jackson-Perkins	1.97	0.18	1.55	0.15	0.42	21.48	Rignot (1996-2017)
Jason Peninsula	0.43	0.04	0.23	0.02	0.2	46.96	Rignot (1996-2017)
Jelbart	10.81	0.9	9.27	0.93	1.64	15.17	Rignot (1996-2017)
Jorum	0.6	0.05	0.55	0.06	-0.04	-6.3	Rignot (1996-2017)
Jutulstraumen	26.54	2.29	29.02	2.9	-3.78	-14.24	Rignot (1996-2017)
Kamb	0.51	0.04	0.66	0.07	-0.15	-30.22	Rignot (1996-2017)
King	1.31	0.14	0.94	0.09	0.37	28.15	Rignot (1996-2017)
Knox Coast	0.14	0.02	0.11	0.01	0.03	20.41	Rignot (1996-2017)
Lambert	19.79	1.12	24.23	2.42	-4.51	-22.81	Rignot (1996-2017)
Land	14.2	1.1	13.69	1.37	-0.13	-0.91	Rignot (1996-2017)
Larsen_B_IS	15.35	1.71	10.5	1.05	2.13	13.89	Rignot (1996-2017)
LarsenA	1.69	0.2	2.86	0.29	-2.45	-144.78	Rignot (1996-2017)
LarsenC	14.37	1.4	15.34	1.53	-0.95	-6.62	Rignot (1996-2017)
LarsenD	10.35	0.97	17.73	1.77	-7.38	-71.29	Rignot (1996-2017)
LarsenE	1.81	0.16	4.28	0.43	-2.47	-136.54	Rignot (1996-2017)
LarsenF	0.99	0.08	1.68	0.17	-0.69	-69.21	Rignot (1996-2017)
LarsenG	0.73	0.07	1.15	0.11	-0.42	-57.87	Rignot (1996-2017)
Lauritzen	2.16	0.18	1.62	0.16	0.54	25.14	Rignot (1996-2017)
Law Dome	10.23	1.05	13.86	1.39	-3.63	-35.46	Rignot (1996-2017)
Lazarev	3.57	0.37	5.29	0.53	-1.3	-36.39	Rignot (1996-2017)
Lennox-King	0.82	0.07	1.34	0.13	-0.52	-62.89	Rignot (1996-2017)
Leopold and Astrid Coast	40.54	3.79	42.13	4.21	-1.53	-3.77	Rignot (1996-2017)
Leppard	2.07	0.21	1.86	0.19	0.77	37.3	Rignot (1996-2017)
Leverett	0.29	0.02	0.87	0.09	-0.58	-197.61	Rignot (1996-2017)
Lillie	3.19	0.29	3.43	0.34	-0.33	-10.5	Rignot (1996-2017)
Lucchitta Velasco	1.85	0.17	2.61	0.26	-0.76	-40.88	Rignot (1996-2017)
MacAyeal	33.02	2.84	24.43	2.44	9.87	29.89	Rignot (1996-2017)
MacRobertson Land	16.13	1.37	17.56	1.76	-1.55	-9.6	Rignot (1996-2017)
Mapple	0.02	0	0.06	0.01	-0.04	-154.65	Rignot (1996-2017)
Mariner	1.43	0.12	2.51	0.25	-1.08	-75.11	Rignot (1996-2017)
Matusevitch	3.98	0.35	4.27	0.43	-0.39	-9.89	Rignot (1996-2017)
Mawson Coast	10.65	1.04	17.07	1.71	-6.42	-60.29	Rignot (1996-2017)
Mellor	17.64	0.92	16.12	1.61	1.37	7.77	Rignot (1996-2017)
Melville	0.12	0.01	0.11	0.01	-0.01	-11.49	Rignot (1996-2017)
Mendelssohn	2.74	0.24	2.19	0.22	0.55	20.04	Rignot (1996-2017)
Mercer	8.53	1.02	9.44	0.94	0.29	3.39	Rignot (1996-2017)
Mertz	16.17	1.28	18.33	1.83	-1.99	-12.29	Rignot (1996-2017)
Minnesota	2.9	0.24	2.29	0.23	0.61	20.9	Rignot (1996-2017)
Moller	17.07	1.47	7.39	0.74	9.72	56.94	Rignot (1996-2017)
Moscow	48.87	4.01	48.43	4.84	1.46	2.98	Rignot (1996-2017)
Mulock	4.83	0.37	4.61	0.46	0.24	4.88	Rignot (1996-2017)
Nickerson	7.72	0.67	7.92	0.79	-0.64	-8.23	Rignot (1996-2017)
Nimrod	3.79	0.27	6.51	0.65	-2.77	-72.88	Rignot (1996-2017)
Ninnis	21.98	1.88	23.28	2.33	-1.03	-4.68	Rignot (1996-2017)
Nivl	4.11	0.32	4.42	0.44	-0.24	-5.96	Rignot (1996-2017)
Oates Coast1	3.46	0.33	4.68	0.47	-1.22	-35.34	Rignot (1996-2017)
Pequod	0.14	0.02	0.07	0.01	0.07	48.85	Rignot (1996-2017)
Pine Island	119.65	9.74	99.83	9.98	5.3	4.43	Rignot (1996-2017)
Prestud	3.65	0.32	2.28	0.23	1.55	42.56	Rignot (1996-2017)
Prietsley-Rieves	1.63	0.14	2.05	0.2	-0.42	-25.62	Rignot (1996-2017)
Prince Harald	8.86	0.92	9.02	0.9	-0.16	-1.81	Rignot (1996-2017)
Prince Harald Coast1	0.81	0.08	0.83	0.08	-0.02	-2.49	Rignot (1996-2017)
Prince Olav Coast	7.12	0.83	20.17	2.02	-13.05	-183.13	Rignot (1996-2017)
Princess Astrid Coast1	0.16	0.01	0.05	0.01	0.11	69.07	Rignot (1996-2017)
Princess Martha Coast1	4.71	0.53	0.21	0.02	4.5	95.54	Rignot (1996-2017)
Prospect	4.56	0.53	3.61	0.36	0.45	9.79	Rignot (1996-2017)
Publications	7.57	0.59	5.68	0.57	1.76	23.23	Rignot (1996-2017)
Punchbowl	0.11	0.01	0.05	0	0.06	57.19	Rignot (1996-2017)
Quar	1.36	0.11	0.95	0.1	0.41	29.98	Rignot (1996-2017)
Rayner Thyer	11.87	0.99	17.41	1.74	-4.92	-41.42	Rignot (1996-2017)
Recovery	37.11	2.74	41.01	4.1	-3.33	-8.97	Rignot (1996-2017)
Rennick	5.5	0.48	5.87	0.59	-0.22	-4.06	Rignot (1996-2017)
Richter	0.36	0.05	0.77	0.08	-0.41	-112.49	Rignot (1996-2017)
Riiser-Larsen	17.21	1.72	18.17	1.82	0.15	0.87	Rignot (1996-2017)
Ronne_IS	187.32	16.12	151.39	15.14	36.88	19.69	Rignot (1996-2017)
Ross East1	0.29	0.03	0.51	0.05	-0.22	-74.68	Rignot (1996-2017)
Ross East2	0.85	0.09	1.72	0.17	-0.87	-103.25	Rignot (1996-2017)
Ross East3	0.92	0.08	1.3	0.13	-0.38	-40.99	Rignot (1996-2017)
Ross East4	1.33	0.13	1.9	0.19	-0.57	-42.71	Rignot (1996-2017)
Ross East5	0.41	0.04	1.25	0.13	-0.84	-207.18	Rignot (1996-2017)
Ross_East_IS	46.43	3.92	64.62	6.46	-17.63	-37.96	Rignot (1996-2017)
Ross_West_IS	99.91	9.23	83.71	8.37	23.98	24.01	Rignot (1996-2017)
Ruppert Coast2	0.48	0.05	0.36	0.04	0.13	25.95	Rignot (1996-2017)
Rutford	22.47	1.88	25.29	2.53	-2.73	-12.15	Rignot (1996-2017)
Rydberg Peninsula	1.5	0.14	1.64	0.16	-0.14	-9.3	Rignot (1996-2017)
Sabrina Coast1	2.56	0.21	3.46	0.35	-0.9	-35.33	Rignot (1996-2017)
Saunders Coast	0.06	0	0.08	0.01	-0.02	-39.33	Rignot (1996-2017)
Scott	2.8	0.25	4.62	0.46	-1.82	-65.29	Rignot (1996-2017)
Shackleton	0.15	0.02	1.06	0.11	-0.91	-586.91	Rignot (1996-2017)
Shirase Glacier	17.54	1.29	16.75	1.67	1.44	8.22	Rignot (1996-2017)
Shirases Coast1	0.17	0.01	0.15	0.01	0.02	12.24	Rignot (1996-2017)
Skelton	2.32	0.2	3.97	0.4	-1.21	-52.14	Rignot (1996-2017)
Slava	3.91	0.35	2.94	0.29	0.97	24.84	Rignot (1996-2017)
Slessor	26.48	2.17	25.66	2.57	1.33	5.02	Rignot (1996-2017)
Stange	20.81	1.76	18.86	1.89	1.99	9.58	Rignot (1996-2017)
Starbuck	0.08	0.01	0.08	0.01	0	4.61	Rignot (1996-2017)
Stubb	0.06	0.01	0.06	0.01	0	5.19	Rignot (1996-2017)
Sulzberger	16.14	1.36	16.59	1.66	-0.4	-2.46	Rignot (1996-2017)
Support Force	11.08	0.9	9.62	0.96	1.63	14.7	Rignot (1996-2017)
Thomson	1.21	0.13	1.23	0.12	-0.02	-1.48	Rignot (1996-2017)
Thwaites	118.7	9.12	98.67	9.87	11.96	10.08	Rignot (1996-2017)
Totten	81.58	6.87	70.73	7.07	11.68	14.32	Rignot (1996-2017)
Tracy Tremenchus	0.69	0.08	0.97	0.1	-0.28	-40.08	Rignot (1996-2017)
Tucker	0.68	0.06	1.89	0.19	-1.21	-179.67	Rignot (1996-2017)
Union	1.28	0.13	1.6	0.16	-0.32	-25.31	Rignot (1996-2017)
Venable	15.08	1.47	16.58	1.66	-2.21	-14.68	Rignot (1996-2017)
Verdi	0.91	0.1	0.82	0.08	0.09	9.79	Rignot (1996-2017)
Victoria Land1	2.43	0.13	7.15	0.72	-4.72	-193.84	Rignot (1996-2017)
Vigrid	2.68	0.25	3.75	0.37	-1.03	-38.2	Rignot (1996-2017)
Vincennes Bay	28.66	2.82	36.01	3.6	-7.22	-25.19	Rignot (1996-2017)
Voyeykov	3.26	0.29	3.24	0.32	0.02	0.57	Rignot (1996-2017)
Walgreen Coast	1.59	0.18	1.44	0.14	0.15	9.43	Rignot (1996-2017)
West Graham Land	64.75	6.74	93.15	9.32	-30.47	-47.06	Rignot (1996-2017)
Whillans	33.1	3.01	28.96	2.9	8.61	26.01	Rignot (1996-2017)
Wilhelm II Coast	19.56	2.08	20.45	2.05	-0.89	-4.54	Rignot (1996-2017)
Wilkes Land1	2.55	0.2	3.42	0.34	-0.87	-34.3	Rignot (1996-2017)
Wilkins George VI	4.07	0.38	4.51	0.45	-0.44	-10.79	Rignot (1996-2017)
Wilkins_IS	10.79	1.05	14.61	1.46	-3.81	-35.34	Rignot (1996-2017)
WilmaRobertDowner	8.56	0.89	12.37	1.24	-3.81	-44.55	Rignot (1996-2017)
Withrow	0.61	0.08	1.31	0.13	-0.7	-116.13	Rignot (1996-2017)
Wordie_IS	17.48	1.71	18.3	1.83	-2.31	-13.22	Rignot (1996-2017)
Zonda Eureka	3.98	0.39	3.35	0.34	0.63	15.82	Rignot (1996-2017)
